# Supplementary material
Source: PubMed Central journal article supplement (PMC8314541)
Supplement: 12967_2021_2992_MOESM1_ESM.pdf [file 12967_2021_2992_MOESM1_ESM.pdf]

# Self-supervised Deep Learning Model for COVID-19 Lung CT Image Segmentation Highlighting Putative Causal Relationship among Age, Underlying Disease and COVID-19

**Daryl L.X. Fung, Qian Liu, Judah Zammit, Carson Kai-Sang Leung, Pingzhao Hu**

## **Sensitivity Analyses**

A series of sensitivity analyses are performed to further support our conclusions. These analyses include: three-fold cross validations using both single SSInfNet and multi SSInfNet to ensure that the performance is consistent, a comparison with transfer learning- based FCN8 (fully convolutional neural network architecture) segmentation network[1], further experiments on other independent datasets[2] to show the generalization ability of our models, ablation studies to explore which techniques (generative adversarial image inpainting, focal loss, and lookahead optimizer) we used in the multi SSInfNet contribute to the improved performance, and a computation cost analysis to show the difference between the different models' computation efficiency. The details of these analyses could be found below.

### **1. Three-fold cross-validation**

We carried out a three-fold cross-validation on the Med-Seg (medical segmentation) COVID-19 Dataset as shown in **Figure 2D** to test the robustness of the proposed SSInfNet. We did this for both single SSInfNet and multi SSInfNet. Since the analysis is time consuming, we did not perform five-fold or 10-fold cross-validation analysis. During self-supervision, we trained the multi SSInfNet to reconstruct the CT lung images and the prior by replacing the last layer to output the reconstruction of the CT lung images. As for the self-supervision of single SSInfNet, we trained

the single SSInfNet to reconstruct the edge and the CT lung images. We undergo self-supervision to help the single SSInfNet and multi SSInfNet learn a good representation of the CT lung images before transferring the learned weights to train on segmenting the infected region of the CT lung images to determine if there is an improvement in performance.

## **2. Comparison with transfer learning**

To address the data set with small labeled samples, we also carried out a comparison of our method and the baseline method with a transfer learning technique, which is also frequently used to overcome small sample size issue [1]. We compared against FCN8 network for segmenting the CT lung images in the Med-Seg (medical segmentation) COVID-19 Dataset as shown in **Figure 2D**. We transferred the learned weights from VGG16 network to the multi FCN8 network and started the training from the pre-trained weights. We then compared the performance of multi FCN8 network with the baseline multi SInfNet and the multi SSInfNet. Originally, the multi FCN8 network receive 3 input channels, we changed the input channels to be 6 to make the model consistent with the other model where the model receives the prior and the CT lung images of which both are concatenated together to form 6 input channels. For the multi SSInfNet, the focal loss alpha is set as 1 and the gamma is set as 2, the lookahead optimizer k is set as 5 and the alpha is set as 0.5. All other parameters are kept the same.

## **3. Additional independent data sets**

To further compare the performance of our proposed method with other baseline methods, we tested them on two additional data sets, which are called as Data set 2 and Data set 3, respectively.

The Med-Seg (medical segmentation) COVID-19 Data set as shown in **Figure 2D** is called as Data set 1.

The Data sets 2 and 3 are detailed as follows: **Data set 2:** This is the original dataset that was used to evaluate the SInfNet [2]. It contains 50 single labeled CT lung images and 48 multi labeled CT lung images for the training set; 48 single & multi labeled images for testing set. There is no validation set. **Data set 3:** The dataset contains 750 CT images for which the segmentation mask is available[3]. These come from 150 patients with novel-coronavirus pneumonia. The images were labelled by a panel of five senior radiologist with over 25 years of experience. The labels used were healthy lung-field, GGO and consolidation. We used the labelled CT images to train a U-Net semantic segmentation model that effectively segments the lung field present in the CT image. Using this model, as well as the opening and closing morphological transformations for noise reduction, we cropped the CT images so that they would only include lung field. Then, for efficiency reasons, we took the middle most slice of each CT scan and removed all others. This ensures that we have a data set with a similar amount of diversity to the original data set, while being significantly smaller. After this, we manually removed any CT images that did not have the lungs in full view or had a significant amount of non-lung field present in the CT image.

#### **4. Ablation studies**

We carried out ablation studies to compare the performance differences between the combination of the different techniques that we incorporated into the multi SInfNet. This analysis helped us determine which one contributes to the improved performance. We carried out 4 different ablations

of our proposed Multi SSInfNet: Multi SSInfNet, Multi SSInfNet – focal loss (without focal loss), Multi SSInfNet – lookahead optimizer (without lookahead optimizer), Multi SSInfNet – focal loss – lookahead optimizer (without focal loss and lookahead optimizer). All other parameters are maintained the same with focal loss alpha as 1 and gamma as 2, the lookahead optimizer k value as 5 and alpha as 0.5.

## **5. Computation cost analysis**

We performed a computation cost analysis to show the difference between the different models' computation efficiency.

## **Reference**

1. Hooda R, Mittal A, Sofat S. Lung segmentation in chest radiographs using fully convolutional networks. Turkish J Electr Eng Comput Sci [Internet]. 2019 [cited 2021 Jun 29];27:710–22. Available from: <https://journals.tubitak.gov.tr/elektrik/abstract.htm?id=24422>
2. Fan D-P, Zhou T, Ji G-P, Zhou Y, Chen G, Fu H, et al. Inf-Net: Automatic COVID-19 Lung Infection Segmentation from CT Images. IEEE Trans Med Imaging [Internet]. Institute of Electrical and Electronics Engineers Inc.; 2020 [cited 2020 Sep 22];39:2626–37. Available from: <http://arxiv.org/abs/2004.14133>
3. Zhang K, Liu X, Shen J, Li Z, Sang Y, Wu X, et al. Clinically Applicable AI System for Accurate Diagnosis, Quantitative Measurements, and Prognosis of COVID-19 Pneumonia Using Computed Tomography. Cell. Cell Press; 2020;181:1423-1433.e11.

## Supplementary Figures

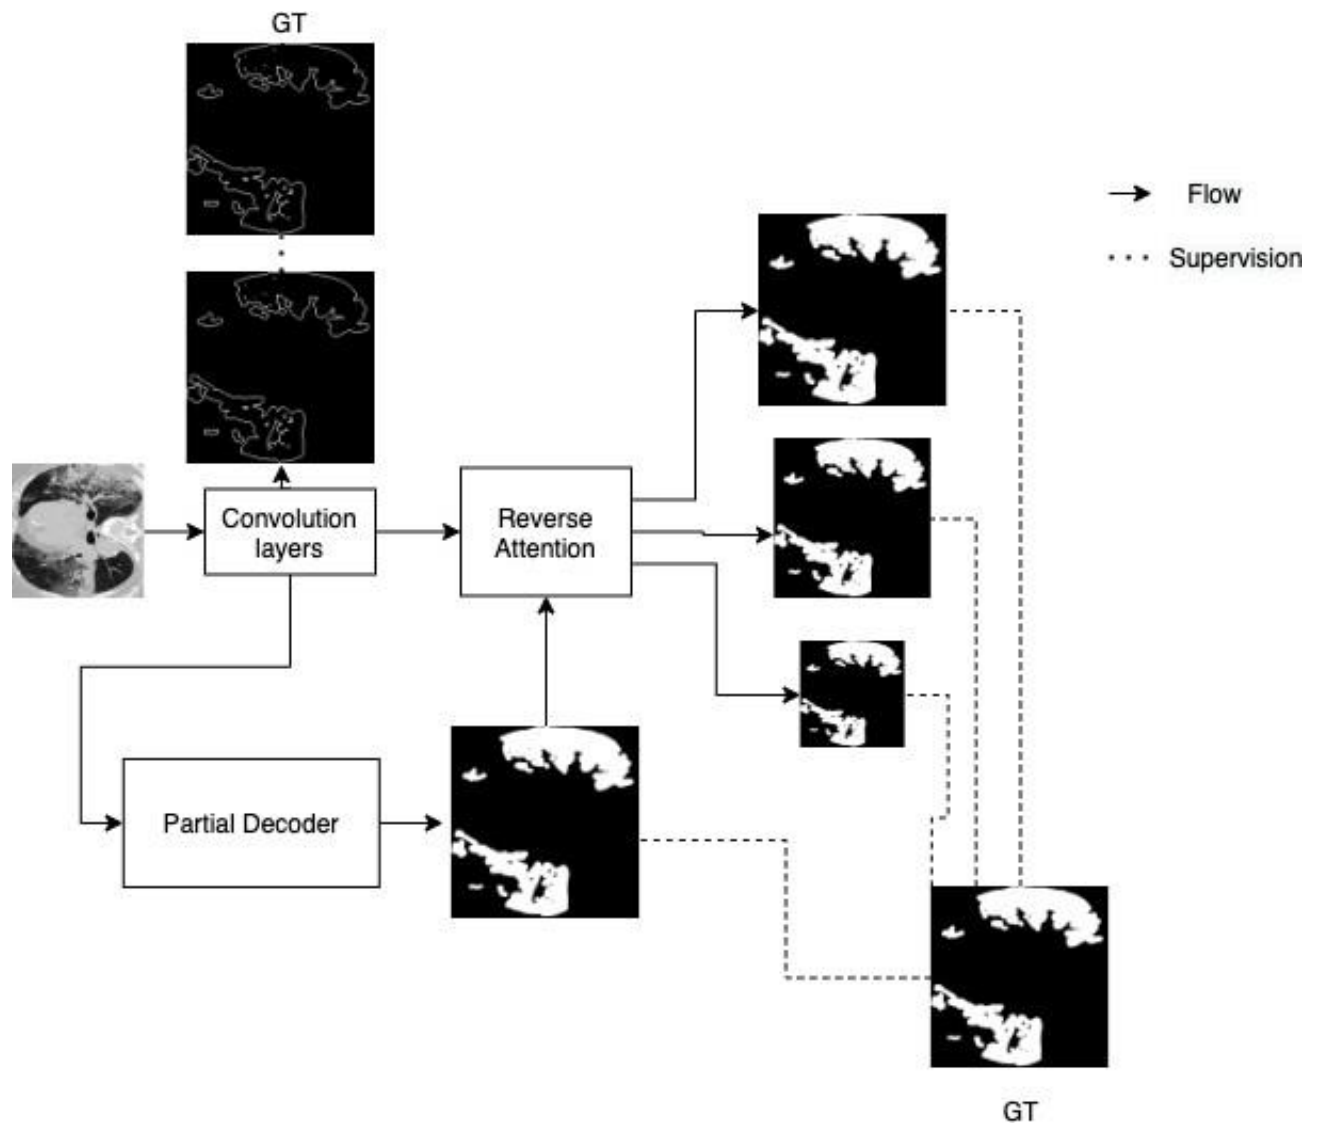

Supplementary Figure 1. Architecture of the supervised InfNet.

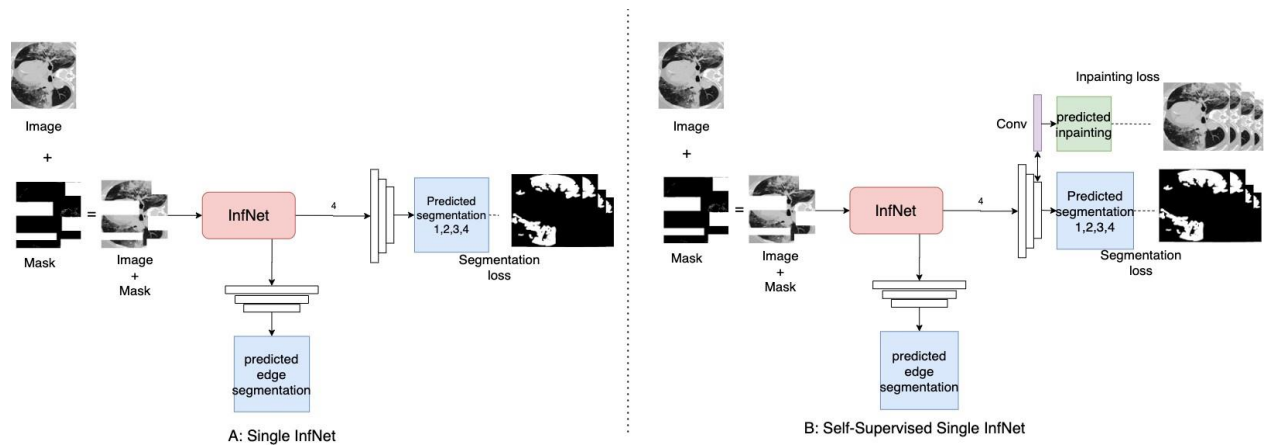

**Supplementary Figure 2.** A is the original architecture of the SInfNet. B is the architecture of our self-supervised InfNet model. Highlighted purple block is the difference between the original single SInfNet and the single SSInfNet.

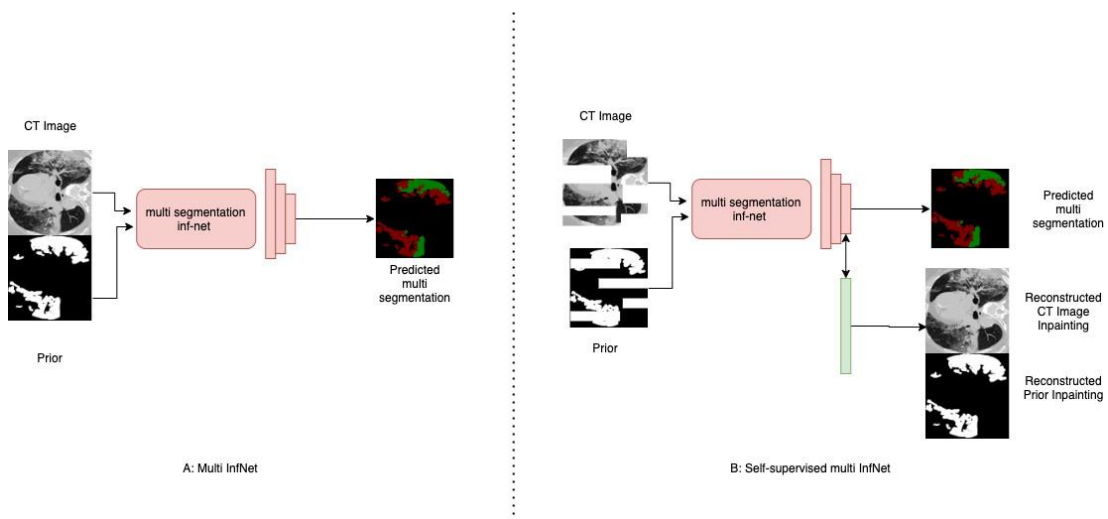

**Supplementary Figure 3.** A is the architecture of the original multi SInfNet model. B is the architecture of our self-supervised multi InfNet model. Highlighted green block is the difference between the original multi SInfNet and our self-supervised multi SSInfNet.

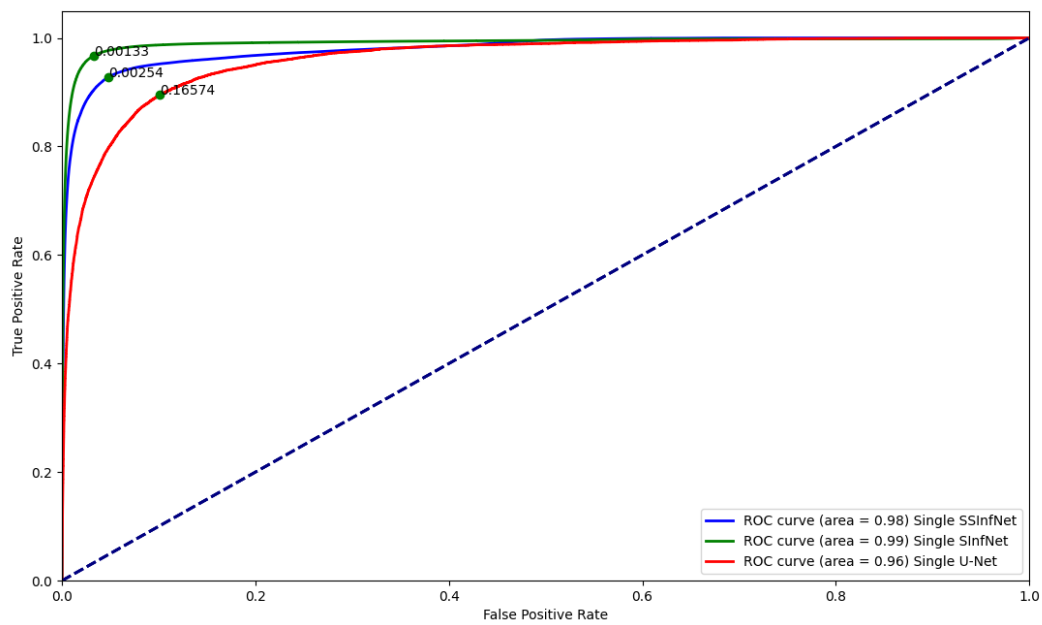

**Supplementary Figure 4. ROC for single InfNet**

### Supplementary Algorithm 1. SSInfNet

---

**Algorithm 1** Pseudo code for self-supervised with InfNet

---

**Input:**  $D_{labeled} = [(inputImage_1, G_{r1}), \dots]$

**for** each epoch **do**

**for** each coach step **do**

        mask =  $M(x)$

        maskedInput =  $mask \odot inputImage$

        predictedImage =  $network(maskedInput), inputImage$

$L_{rec} = CrossEntropy(predictedImage, inputImage)$

$L_{coach}(x) = 1 - L_{rec}$

        update coach weights

**end for**

**for** each network step **do**

$P_{labeled} = Preprocess(D_{labeled})$

        inpaintingOutput =  $network(P_{labeled})$

$L_{rec} = CrossEntropy(InpaintingOutput, inputImage)$

        backpropogate and save network weights

**end for**

**end for**

**for** each batch of  $D_{labeled}$ : **do**

$P_{labeled} = Preprocess(D_{labeled})$

    trainLoss =  $train(P_{labeled})$

    Backpropagate train loss

    testLoss =  $test(P_{labeled})$

    save model weights,  $w$ .

**end for**

---



## Supplementary Tables

### Supplementary Table 1. Image phenotypes

| Image Phenotype           | Description                           | Formula                                                                              |                                                                                                                                                                         |
|---------------------------|---------------------------------------|--------------------------------------------------------------------------------------|-------------------------------------------------------------------------------------------------------------------------------------------------------------------------|
| First Order Features (20) | Area                                  | The number of pixels in the mask.                                                    |                                                                                                                                                                         |
|                           | Energy                                | The magnitude of voxel values in an image.                                           | $\sum_{i=1}^{N_p} (X(i) + c)^2$ <p>Here, c is optional value shifting the intensities to prevent negative values in <b>X</b></p>                                        |
|                           | Total Energy                          | Energy scaled by the volume of the voxel.                                            | $V_{\text{voxel}} \sum_{i=1}^{N_p} (X(i) + c)^2$                                                                                                                        |
|                           | Entropy                               | The uncertainty/randomness in the image values.                                      | $-\sum_{i=1}^{N_g} p(i) \log_2(p(i) + \epsilon)$ <p>Here, <math>\epsilon</math> is an arbitrarily small positive number (<math>\approx 2.2 \times 10^{-16}</math>).</p> |
|                           | Minimum                               | The Minimum of <b>X</b>                                                              | $\min(\mathbf{X})$                                                                                                                                                      |
|                           | 10th percentile                       | The 10th percentile of <b>X</b>                                                      |                                                                                                                                                                         |
|                           | 90th percentile                       | The 90th percentile of <b>X</b>                                                      |                                                                                                                                                                         |
|                           | Maximum                               | The maximum of <b>X</b>                                                              | $\max(\mathbf{X})$                                                                                                                                                      |
|                           | Mean                                  | The average gray level intensity.                                                    | $\frac{1}{N_p} \sum_{i=1}^{N_p} X(i)$                                                                                                                                   |
|                           | Median                                | The median gray level intensity.                                                     |                                                                                                                                                                         |
|                           | Interquartile Range                   | The subtract of 25 <sup>th</sup> and 75 <sup>th</sup> percentile of the image array. | <b>P75–P25</b>                                                                                                                                                          |
|                           | Range                                 | The range of gray values.                                                            | $\max(\mathbf{X}) - \min(\mathbf{X})$                                                                                                                                   |
|                           | Mean Absolute Deviation (MAD)         | The mean distance of all intensity values from the Mean Value of the image array.    | $\frac{1}{N_p} \sum_{i=1}^{N_p}  X(i) - \bar{X} $                                                                                                                       |
|                           | Robust Mean Absolute Deviation (RMAD) | The mean distance of all intensity values from the mean value.                       | $\frac{1}{N_{10-90}} \sum_{i=1}^{N_{10-90}}  X_{10-90}(i) - \bar{X}_{10-90} $                                                                                           |
|                           | Root Mean Squared (RMS)               | The square-root of the mean of all the squared intensity values.                     | $\sqrt{\frac{1}{N_p} \sum_{i=1}^{N_p} (X(i) + c)^2}$                                                                                                                    |
|                           | Skewness                              | The asymmetry of the distribution of values about the mean value.                    | $\frac{\frac{1}{N_p} \sum_{i=1}^{N_p} (X(i) - \bar{X})^3}{\sqrt{\frac{1}{N_p} \sum_{i=1}^{N_p} (X(i) - \bar{X})^2}}$                                                    |

|                                                      |                     |                                                                                                                                                                                                                     |                                                                                                                      |
|------------------------------------------------------|---------------------|---------------------------------------------------------------------------------------------------------------------------------------------------------------------------------------------------------------------|----------------------------------------------------------------------------------------------------------------------|
|                                                      | Kurtosis            | A higher value means that the mass of the distribution is concentrated towards the tail(s) rather than towards the mean. A lower value means that the mass of the distribution is concentrated near the mean value. | $\frac{\frac{1}{N_p} \sum_{i=1}^{N_p} (X(i) - \bar{X})^4}{\sqrt{\frac{1}{N_p} \sum_{i=1}^{N_p} (X(i) - \bar{X})^2}}$ |
|                                                      | Variance            | The mean of the squared distances of each intensity value from the Mean value.                                                                                                                                      | $\frac{1}{N_p} \sum_{i=1}^{N_p} (X(i) - \bar{X})^2$                                                                  |
|                                                      | Uniformity          | A higher value means a smaller range of discrete intensity.                                                                                                                                                         | $\sum_{i=1}^{N_g} p(i)^2$                                                                                            |
| Gray Level Co-occurrence Matrix (GLCM) Features (28) | Autocorrelation     | the magnitude of the fineness and coarseness of texture.                                                                                                                                                            | $\sum_{i=1}^{N_g} \sum_{j=1}^{N_g} p(i, j) i j$                                                                      |
|                                                      | Joint Average       | Returns the mean gray level intensity of the $i$ distribution.                                                                                                                                                      | $\sum_{i=1}^{N_g} \sum_{j=1}^{N_g} p(i, j) i$                                                                        |
|                                                      | Cluster Prominence  | The skewness and asymmetry of the GLCM.                                                                                                                                                                             | $\sum_{i=1}^{N_g} \sum_{j=1}^{N_g} (i + j - \mu_x - \mu_y)^4 p(i, j)$                                                |
|                                                      | Cluster Shade       | The skewness and uniformity of the GLCM.                                                                                                                                                                            | $\sum_{i=1}^{N_g} \sum_{j=1}^{N_g} (i + j - \mu_x - \mu_y)^3 p(i, j)$                                                |
|                                                      | Cluster Tendency    | The grouping of voxels with similar gray-level values.                                                                                                                                                              | $\sum_{i=1}^{N_g} \sum_{j=1}^{N_g} (i + j - \mu_x - \mu_y)^2 p(i, j)$                                                |
|                                                      | Contrast            | The local intensity variation. A larger value is associated with a greater disparity among neighboring voxels.                                                                                                      | $\sum_{i=1}^{N_g} \sum_{j=1}^{N_g} (i - j)^2 p(i, j)$                                                                |
|                                                      | Correlation         | The linear dependency of gray level values to their respective voxels in the GLCM.                                                                                                                                  | $\frac{\sum_{i=1}^{N_g} \sum_{j=1}^{N_g} p(i, j) i j - \mu_x \mu_y}{\sigma_x(i) \sigma_y(j)}$                        |
|                                                      | Difference Average  | The difference between occurrences of pairs with similar intensity values and occurrences of pairs with differing intensity values.                                                                                 | $\sum_{k=0}^{N_g-1} k p_{x-y}(k)$                                                                                    |
|                                                      | Difference Entropy  | The randomness/variability in neighborhood intensity value differences.                                                                                                                                             | $\sum_{k=0}^{N_g-1} p_{x-y}(k) \log_2(p_{x-y}(k) + \epsilon)$                                                        |
|                                                      | Difference Variance | The heterogeneity that places higher weights on differing intensity level pairs that deviate more from the mean.                                                                                                    | $\sum_{k=0}^{N_g-1} (k - DA)^2 p_{x-y}(k)$                                                                           |
|                                                      | Dissimilarity       |                                                                                                                                                                                                                     | $\sum_{i=1}^{N_g} \sum_{j=1}^{N_g}  i - j  p(i, j)$                                                                  |
|                                                      | Joint Energy        | The homogeneous patterns in the image. A greater Energy implies                                                                                                                                                     | $\sum_{i=1}^{N_g} \sum_{j=1}^{N_g} p(i, j)^2$                                                                        |

|                                               |                                                                                                                                                                           |                                                                      |                                                                                                                                                                                                 |
|-----------------------------------------------|---------------------------------------------------------------------------------------------------------------------------------------------------------------------------|----------------------------------------------------------------------|-------------------------------------------------------------------------------------------------------------------------------------------------------------------------------------------------|
|                                               |                                                                                                                                                                           | that there are more instances of intensity value pairs in the image. |                                                                                                                                                                                                 |
| Joint Entropy                                 | The randomness/variability in neighborhood intensity values.                                                                                                              |                                                                      | $- \sum_{i=1}^{N_g} \sum_{j=1}^{N_g} p(i, j)^2 \log_2(p(i, j) + \epsilon)$                                                                                                                      |
| Homogeneity 1                                 |                                                                                                                                                                           |                                                                      | $\sum_{i=1}^{N_g} \sum_{j=1}^{N_g} \frac{p(i, j)}{1 +  i - j }$                                                                                                                                 |
| Homogeneity 2                                 |                                                                                                                                                                           |                                                                      | $\sum_{i=1}^{N_g} \sum_{j=1}^{N_g} \frac{p(i, j)}{1 +  i - j ^2}$                                                                                                                               |
| Informational Measure of Correlation 1 (IMC1) | The correlation between the probability distributions of $i$ and $j$ (quantifying the complexity of the texture), using mutual information $I(x, y)$                      |                                                                      | $\frac{HXY - HXY1}{\max\{HX, HY\}}$ $- I(i, j)$ $= \sum_{i=1}^{N_g} \sum_{j=1}^{N_g} p(i, j) \log_2(p_x(i)p_y(j))$ $- \sum_{i=1}^{N_g} \sum_{j=1}^{N_g} p(i, j) \log_2(p(i, j))$ $= HXY - HXY1$ |
| Informational Measure of Correlation 2 (IMC2) | The correlation between the probability distributions of $i$ and $j$ (quantifying the complexity of the texture).                                                         |                                                                      | $\sqrt{1 - e^{-2(HXY2 - HXY)}}$                                                                                                                                                                 |
| Inverse Difference Moment (IDM)               | The local homogeneity of an image.                                                                                                                                        |                                                                      | $\sum_{k=0}^{N_g-1} \frac{p_{x-y}(k)}{1 + k^2}$                                                                                                                                                 |
| Maximal Correlation Coefficient (MCC)         | The complexity of the texture                                                                                                                                             |                                                                      | $MCC =$ $\sqrt{\text{second largest eignvalue of } Q}$ $Q(i, j) = \sum_{k=0}^{N_g} \frac{p(i, k)p(j, k)}{p_x(i)p_y(k)}$                                                                         |
| Inverse Difference Moment Normalized (IDMN)   | The local homogeneity of an image.                                                                                                                                        |                                                                      | $\sum_{k=0}^{N_g-1} \frac{p_{x-y}(k)}{1 + \left(\frac{k^2}{N_g^2}\right)}$                                                                                                                      |
| Inverse Difference (ID)                       | The local homogeneity of an image. With more uniform gray levels, the denominator will remain low, resulting in a higher overall value.                                   |                                                                      | $\sum_{k=0}^{N_g-1} \frac{p_{x-y}(k)}{1 + k}$                                                                                                                                                   |
| Inverse Difference Normalized (IDN)           | The local homogeneity of an image. IDN normalizes the difference between the neighboring intensity values by dividing over the total number of discrete intensity values. |                                                                      | $\sum_{k=0}^{N_g-1} \frac{p_{x-y}(k)}{1 + \left(\frac{k}{N_g}\right)}$                                                                                                                          |

|                                                   |                                           |                                                                                                                                          |                                                                                                                    |
|---------------------------------------------------|-------------------------------------------|------------------------------------------------------------------------------------------------------------------------------------------|--------------------------------------------------------------------------------------------------------------------|
|                                                   | Inverse Variance                          |                                                                                                                                          | $\sum_{k=0}^{N_g-1} \frac{p_{x-y}(k)}{k^2}$                                                                        |
|                                                   | Maximum Probability                       | The most predominant pair of neighboring intensity values.                                                                               | $\max(p(i, j))$                                                                                                    |
|                                                   | Sum Average                               | The relationship between occurrences of pairs with lower intensity values and occurrences of pairs with higher intensity values.         | $\sum_{k=2}^{2N_g} p_{x+y}(k)k$                                                                                    |
|                                                   | Sum Variance                              |                                                                                                                                          | $\sum_{k=2}^{2N_g} (k - SA)^2 p_{x+y}(k)$                                                                          |
|                                                   | Sum Entropy                               | The distribution of neighboring intensity level pairs about the mean intensity level in the GLCM.                                        | $\sum_{i=1}^{N_g} \sum_{j=1}^{N_g} (i - \mu_x)^2 p(i, j)$                                                          |
| Gray Level Dependence Matrix (GLDM) Features (15) | Small Dependence Emphasis                 | The distribution of small dependencies. A larger value indicates less homogeneous textures.                                              | $\frac{\sum_{i=1}^{N_g} \sum_{j=1}^{N_d} \frac{P(i, j)}{i^2}}{N_Z}$                                                |
|                                                   | Large Dependence Emphasis                 | The distribution of large dependencies. A larger value means more homogeneous textures.                                                  | $\frac{\sum_{i=1}^{N_g} \sum_{j=1}^{N_d} P(i, j)j^2}{N_Z}$                                                         |
|                                                   | Gray Level (GL) Non-Uniformity            | The similarity of gray-level intensity values in the image                                                                               | $\frac{\sum_{i=1}^{N_g} (\sum_{j=1}^{N_d} P(i, j))^2}{N_Z}$                                                        |
|                                                   | Gray Level (GL) Non-Uniformity Normalized |                                                                                                                                          | $\frac{\sum_{i=1}^{N_g} (\sum_{j=1}^{N_d} P(i, j))^2}{\sum_{i=1}^{N_g} \sum_{j=1}^{N_d} P(i, j)^2}$                |
|                                                   | Dependence Non-Uniformity                 | The similarity of dependence throughout the image.                                                                                       | $\frac{\sum_{j=1}^{N_d} (\sum_{i=1}^{N_g} P(i, j))^2}{N_Z}$                                                        |
|                                                   | Dependence Non-Uniformity Normalized      |                                                                                                                                          | $\frac{\sum_{j=1}^{N_d} (\sum_{i=1}^{N_g} P(i, j))^2}{N_Z^2}$                                                      |
|                                                   | Gray Level (GL) Variance                  | The variance in grey level in the image.                                                                                                 | $\sum_{i=1}^{N_g} \sum_{j=1}^{N_d} P(i, j)(i - \mu)^2$<br>Where $\mu = \sum_{i=1}^{N_g} \sum_{j=1}^{N_d} iP(i, j)$ |
|                                                   | Dependence Variance                       | The variance in dependence size in the image.                                                                                            | $\sum_{i=1}^{N_g} \sum_{j=1}^{N_d} P(i, j)(j - \mu)^2$<br>Where $\mu = \sum_{i=1}^{N_g} \sum_{j=1}^{N_d} jP(i, j)$ |
|                                                   | Dependence Entropy                        |                                                                                                                                          | $\sum_{i=1}^{N_g} \sum_{j=1}^{N_d} p(i, j) \log_2(p(i, j) + \epsilon)$                                             |
|                                                   | Low Gray Level (LGL) Emphasis             | The distribution of low gray-level values, with a higher value indicating a greater concentration of low gray-level values in the image. | $\frac{\sum_{i=1}^{N_g} \sum_{j=1}^{N_d} \frac{P(i, j)}{i^2}}{N_Z}$                                                |

|                                                              |                                                   |                                                                                                                                                  |                                                                                                                                                                  |
|--------------------------------------------------------------|---------------------------------------------------|--------------------------------------------------------------------------------------------------------------------------------------------------|------------------------------------------------------------------------------------------------------------------------------------------------------------------|
|                                                              | High Gray Level (HGL) Emphasis                    | The distribution of the higher gray-level values, with a higher value indicating a greater concentration of high gray-level values in the image. | $\frac{\sum_{i=1}^{N_g} \sum_{j=1}^{N_d} P(i, j) i^2}{N_z}$                                                                                                      |
|                                                              | Small Dependence Low Gray Level (SDLGL) Emphasis  | The joint distribution of small dependence with lower gray-level values.                                                                         | $\frac{\sum_{i=1}^{N_g} \sum_{j=1}^{N_d} \frac{P(i, j)}{i^2 j^2}}{N_z}$                                                                                          |
|                                                              | Small Dependence High Gray Level (SDGHL) Emphasis | The joint distribution of small dependence with higher gray-level values.                                                                        |                                                                                                                                                                  |
|                                                              | Large Dependence Low Gray Level (LDLGL) Emphasis  | The joint distribution of large dependence with lower gray-level values.                                                                         | $\frac{\sum_{i=1}^{N_g} \sum_{j=1}^{N_d} \frac{P(i, j) j^2}{i^2}}{N_z}$                                                                                          |
|                                                              | Large Dependence High Gray Level (LDHGL) Emphasis | The joint distribution of large dependence with higher gray-level values.                                                                        | $\frac{\sum_{i=1}^{N_g} \sum_{j=1}^{N_d} P(i, j) i^2 j^2}{N_z}$                                                                                                  |
| Neighboring Gray Tone Difference Matrix (NGTDM) Features (5) | Coarseness                                        | An indicator of the spatial rate of change. Higher value indicates lower spatial change rate and a locally more uniform texture.                 | $\frac{1}{\sum_{i=1}^{N_g} p_i s_i}$                                                                                                                             |
|                                                              | Contrast                                          | The spatial intensity change depending on the overall gray level dynamic range.                                                                  | $\left( \frac{1}{N_{g,p}(N_{g,p} - 1)} \sum_{i=1}^{N_g} \sum_{j=1}^{N_g} p_i p_j (i - j)^2 \right) \times \left( \frac{1}{N_{v,p}} \sum_{i=1}^{N_g} s_i \right)$ |
|                                                              | Busyness                                          | The change from a pixel to its neighbor. A high value indicates a rapid changing.                                                                | $\frac{\sum_{i=1}^{N_g} p_i s_i}{\sum_{i=1}^{N_g} \sum_{j=1}^{N_g}  p_i - p_j }$                                                                                 |
|                                                              | Complexity                                        | The non-uniformity and busyness of the image.                                                                                                    | $\frac{1}{N_{v,p}} \sum_{i=1}^{N_g} \sum_{j=1}^{N_g}  i - j  \frac{p_i s_i + p_j s_j}{p_i + p_j}$                                                                |
|                                                              | Strength                                          | A greater value means slow change in intensity but larger coarse differences in gray level intensities.                                          | $\frac{\sum_{i=1}^{N_g} \sum_{j=1}^{N_g} (p_i + p_j) (i - j)^2}{\sum_{i=1}^{N_g} s_i}$                                                                           |

**Supplementary Table 2. The three-fold cross-validation performance of single networks.** It should be noted that the data were obtained by combining the training, testing, and validation set from the Med-Seg (medical segmentation) COVID-19 dataset, and then splitting the combined data into 3 folds.

| Three-fold Cross-Validation Performance for Single Segmentation |              |       |                |       |                 |       |
|-----------------------------------------------------------------|--------------|-------|----------------|-------|-----------------|-------|
|                                                                 | Single U-Net |       | Single SInfNet |       | Single SSInfNet |       |
|                                                                 | Mean         | Error | Mean           | Error | Mean            | error |
| F1                                                              | 0.39         | 0.05  | <b>0.76</b>    | 0.04  | 0.72            | 0.04  |
| IoU                                                             | 0.28         | 0.04  | <b>0.64</b>    | 0.04  | 0.60            | 0.04  |
| Recall                                                          | 0.38         | 0.05  | 0.77           | 0.04  | 0.77            | 0.04  |
| Precision                                                       | 0.41         | 0.05  | <b>0.79</b>    | 0.04  | 0.76            | 0.02  |

**Supplementary Table 3. The three-fold cross validation performance of multi networks**

|               | Cross-Validation Performance for Multi Segmentation |            |       |               |       |                |       |
|---------------|-----------------------------------------------------|------------|-------|---------------|-------|----------------|-------|
|               |                                                     | Multi-UNet |       | Multi-SInfNet |       | Multi-SSInfNet |       |
|               |                                                     | Mean       | Error | Mean          | error | Mean           | Error |
| GGO           | F1                                                  | 0.26       | 0.04  | 0.69          | 0.06  | <b>0.70</b>    | 0.06  |
|               | IoU                                                 | 0.17       | 0.03  | 0.63          | 0.06  | <b>0.64</b>    | 0.06  |
|               | Recall                                              | 0.25       | 0.03  | <b>0.77</b>   | 0.05  | 0.72           | 0.06  |
|               | Precision                                           | 0.3        | 0.04  | 0.73          | 0.05  | <b>0.79</b>    | 0.05  |
| Consolidation | F1                                                  | 0.18       | 0.04  | 0.39          | 0.07  | <b>0.61</b>    | 0.07  |
|               | IoU                                                 | 0.13       | 0.03  | 0.33          | 0.06  | <b>0.55</b>    | 0.07  |
|               | Recall                                              | 0.21       | 0.04  | 0.45          | 0.06  | <b>0.68</b>    | 0.07  |
|               | Precision                                           | 0.19       | 0.04  | <b>0.82</b>   | 0.04  | 0.74           | 0.07  |
| Background    | F1                                                  | 1          | 0     | 1             | 0     | 1              | 0     |
|               | IoU                                                 | 1          | 0     | 1             | 0     | 1              | 0     |
|               | Recall                                              | 1          | 0     | 1             | 0     | 1              | 0     |
|               | Precision                                           | 1          | 0     | 1             | 0     | 1              | 0     |
| Overall       | F1                                                  | 0.48       | 0.03  | 0.69          | 0.04  | <b>0.77</b>    | 0.04  |
|               | IoU                                                 | 0.43       | 0.02  | 0.65          | 0.04  | <b>0.73</b>    | 0.04  |
|               | Recall                                              | 0.49       | 0.02  | 0.74          | 0.04  | <b>0.80</b>    | 0.04  |
|               | Precision                                           | 0.5        | 0.03  | <b>0.85</b>   | 0.03  | 0.84           | 0.04  |

**Supplementary Table 4. Comparison with transfer learning based FCN8 network.** Quantitative result of Ground-glass Opacities & Consolidation on the test data set of the Med-Seg (medical segmentation) COVID-19 dataset. Prior was obtained from the single segmentation InfNet.

| Methods    |           | Multi FCN8 |       | Multi U-Net |       | Multi SInfNet |       | Multi SSInfNet |       |
|------------|-----------|------------|-------|-------------|-------|---------------|-------|----------------|-------|
|            |           | mean       | error | mean        | error | mean          | error | mean           | error |
| GGO        | F1        | 0.41       | 0.059 | 0.26        | 0.057 | 0.38          | 0.054 | <b>0.43</b>    | 0.057 |
|            | IoU       | 0.3        | 0.046 | 0.18        | 0.043 | 0.27          | 0.042 | <b>0.31</b>    | 0.046 |
|            | Recall    | 0.45       | 0.066 | 0.216       | 0.053 | <b>0.58</b>   | 0.065 | <b>0.58</b>    | 0.072 |
|            | Precision | 0.52       | 0.06  | 0.405       | 0.085 | 0.41          | 0.058 | <b>0.48</b>    | 0.059 |
| Cons       | F1        | 0.42       | 0.092 | 0.35        | 0.097 | 0.29          | 0.078 | <b>0.46</b>    | 0.096 |
|            | IoU       | 0.33       | 0.082 | 0.26        | 0.08  | 0.22          | 0.068 | <b>0.36</b>    | 0.088 |
|            | Recall    | 0.56       | 0.097 | 0.32        | 0.089 | <b>0.61</b>   | 0.099 | 0.56           | 0.11  |
|            | Precision | 0.51       | 0.103 | 0.46        | 0.116 | 0.31          | 0.084 | <b>0.56</b>    | 0.101 |
| Background | F1        | 1.0        | 0.002 | 0.857       | 0.01  | 1.0           | 0.002 | <b>1.00</b>    | 0.002 |
|            | IoU       | 0.99       | 0.003 | 0.754       | 0.017 | 0.99          | 0.003 | <b>0.99</b>    | 0.003 |
|            | Recall    | 1.0        | 0.001 | 0.998       | 0.001 | 0.99          | 0.002 | <b>0.99</b>    | 0.002 |
|            | Precision | 0.99       | 0.002 | 0.755       | 0.017 | 1.0           | 0.002 | <b>1.00</b>    | 0.002 |
| Overall    | F1        | 0.61       | 0.051 | 0.49        | 0.055 | 0.55          | 0.044 | <b>0.63</b>    | 0.052 |
|            | IoU       | 0.54       | 0.044 | 0.40        | 0.046 | 0.5           | 0.038 | <b>0.55</b>    | 0.046 |
|            | Recall    | 0.67       | 0.055 | 0.51        | 0.048 | <b>0.73</b>   | 0.055 | 0.71           | 0.061 |
|            | Precision | 0.67       | 0.055 | 0.54        | 0.073 | 0.57          | 0.048 | <b>0.68</b>    | 0.054 |

**Supplementary Table 5. Model performance on independent COVID-19 CT Dataset set 2**

**A: Single InfNet**

|           | SInfNet     |              | SSInfNet    |       |
|-----------|-------------|--------------|-------------|-------|
|           | Mean        | Error        | Mean        | error |
| F1        | <b>0.8</b>  | <b>0.011</b> | 0.78        | 0.028 |
| IoU       | <b>0.67</b> | <b>0.016</b> | 0.64        | 0.038 |
| Recall    | 0.79        | <b>0.014</b> | <b>0.84</b> | 0.017 |
| Precision | <b>0.82</b> | <b>0.038</b> | 0.73        | 0.061 |

**B: Multi InfNet**

|               |           | Multi-SInfNet |              | Multi-SSInfNet |              |
|---------------|-----------|---------------|--------------|----------------|--------------|
|               |           | Mean          | Error        | Mean           | error        |
| GGO           | F1        | <b>0.79</b>   | <b>0.056</b> | 0.70           | 0.066        |
|               | IoU       | <b>0.72</b>   | <b>0.064</b> | 0.61           | 0.065        |
|               | Recall    | <b>0.77</b>   | <b>0.064</b> | 0.67           | 0.07         |
|               | Precision | 0.89          | 0.043        | <b>0.89</b>    | <b>0.038</b> |
| Consolidation | F1        | <b>0.48</b>   | 0.101        | 0.38           | <b>0.096</b> |
|               | IoU       | <b>0.39</b>   | 0.092        | 0.32           | <b>0.085</b> |
|               | Recall    | 0.70          | 0.104        | <b>0.78</b>    | <b>0.096</b> |
|               | Precision | <b>0.52</b>   | 0.107        | 0.38           | <b>0.097</b> |
| Background    | F1        | 1             | 0            | 1              | 0            |
|               | IoU       | 1             | 0            | 1              | 0            |
|               | Recall    | 1             | 0            | 1              | 0            |
|               | Precision | 1             | 0            | 1              | 0            |
| Overall       | F1        | <b>0.76</b>   | <b>0.052</b> | 0.70           | 0.054        |
|               | IoU       | <b>0.70</b>   | 0.052        | 0.64           | <b>0.05</b>  |
|               | Recall    | <b>0.82</b>   | 0.056        | 0.81           | <b>0.055</b> |
|               | Precision | <b>0.80</b>   | 0.05         | 0.76           | <b>0.045</b> |



**Supplementary Table 6. Model performance on the independent COVID-19 CT Data set 3**

**A: Single InfNet**

|           | SInfNet     |       | SSInfNet |       |
|-----------|-------------|-------|----------|-------|
|           | Mean        | Error | Mean     | error |
| F1        | <b>0.96</b> | 0.002 | 0.58     | 0.009 |
| IoU       | <b>0.93</b> | 0.003 | 0.41     | 0.009 |
| Recall    | <b>0.96</b> | 0.001 | 0.53     | 0.007 |
| Precision | <b>0.97</b> | 0.005 | 0.64     | 0.013 |

**B: Multi InfNet**

|               |           | Multi-SInfNet |       | Multi-SSInfNet |       |
|---------------|-----------|---------------|-------|----------------|-------|
|               |           | Mean          | Error | Mean           | error |
| GGO           | F1        | 0.94          | 0.019 | <b>0.94</b>    | 0.017 |
|               | IoU       | 0.89          | 0.029 | <b>0.90</b>    | 0.028 |
|               | Recall    | 0.94          | 0.022 | <b>0.99</b>    | 0.002 |
|               | Precision | <b>0.94</b>   | 0.019 | 0.91           | 0.028 |
| Consolidation | F1        | 0.11          | 0.05  | <b>0.13</b>    | 0.06  |
|               | IoU       | 0.07          | 0.037 | <b>0.09</b>    | 0.044 |
|               | Recall    | 0.10          | 0.046 | <b>0.10</b>    | 0.048 |
|               | Precision | 0.20          | 0.079 | <b>0.73</b>    | 0.114 |
| Background    | F1        | 0.95          | 0.011 | <b>0.98</b>    | 0.001 |
|               | IoU       | 0.91          | 0.019 | <b>0.97</b>    | 0.002 |
|               | Recall    | 0.98          | 0.002 | <b>0.98</b>    | 0.002 |
|               | Precision | 0.93          | 0.02  | <b>0.99</b>    | 0.001 |
| Overall       | F1        | 0.67          | 0.027 | <b>0.69</b>    | 0.026 |
|               | IoU       | 0.62          | 0.029 | <b>0.65</b>    | 0.024 |
|               | Recall    | 0.68          | 0.024 | <b>0.69</b>    | 0.017 |
|               | Precision | 0.69          | 0.039 | <b>0.87</b>    | 0.048 |

**Supplementary Table 7. Results of ablation studies.** The performance of the ablation of our proposed multi-SSInfNet. Multi-SSInfNet refers to the self-supervised SInfNet with Focal Loss and Lookahead optimizer. We tried a variety of the model with a subtraction of the different technologies to carry out the ablation.

|               |           | Multi-SInfNet |       | Multi-SSInfNet – Focal - Lookahead |       | Multi-SSInfNet - lookahead |       | Multi-SSInfNet - Focal |       | Multi-SSInfNet |       |
|---------------|-----------|---------------|-------|------------------------------------|-------|----------------------------|-------|------------------------|-------|----------------|-------|
|               |           | Mean          | Error | Mean                               | Error | Mean                       | Error | Mean                   | error | Mean           | Error |
| GGO           | F1        | 0.38          | 0.054 | 0.39                               | 0.057 | 0.36                       | 0.055 | 0.36                   | 0.056 | <b>0.43</b>    | 0.057 |
|               | IoU       | 0.27          | 0.062 | 0.29                               | 0.045 | 0.26                       | 0.044 | 0.26                   | 0.044 | <b>0.31</b>    | 0.046 |
|               | Recall    | 0.58          | 0.045 | 0.59                               | 0.071 | <b>0.60</b>                | 0.066 | 0.58                   | 0.071 | 0.58           | 0.072 |
|               | Precision | 0.41          | 0.058 | 0.44                               | 0.06  | 0.38                       | 0.058 | 0.39                   | 0.058 | <b>0.48</b>    | 0.059 |
| Consolidation | F1        | 0.29          | 0.078 | <b>0.47</b>                        | 0.1   | 0.39                       | 0.091 | 0.42                   | 0.093 | 0.46           | 0.096 |
|               | IoU       | 0.22          | 0.068 | <b>0.37</b>                        | 0.093 | 0.32                       | 0.082 | 0.32                   | 0.083 | 0.36           | 0.088 |
|               | Recall    | <b>0.61</b>   | 0.099 | 0.54                               | 0.118 | 0.52                       | 0.112 | 0.59                   | 0.106 | 0.56           | 0.11  |
|               | Precision | 0.31          | 0.084 | <b>0.61</b>                        | 0.104 | 0.51                       | 0.104 | 0.49                   | 0.102 | 0.56           | 0.101 |
| Background    | F1        | 1             | 0.002 | 1                                  | 0.002 | 1                          | 0.002 | 1                      | 0.002 | <b>1</b>       | 0.002 |
|               | IoU       | 0.99          | 0.003 | 0.99                               | 0.003 | 0.99                       | 0.003 | 0.99                   | 0.003 | <b>0.99</b>    | 0.003 |
|               | Recall    | 0.99          | 0.002 | 0.99                               | 0.002 | 0.99                       | 0.002 | 0.99                   | 0.002 | <b>0.99</b>    | 0.002 |
|               | Precision | 1             | 0.002 | 1                                  | 0.002 | 1                          | 0.002 | 1                      | 0.002 | <b>1</b>       | 0.002 |
| Overall       | F1        | 0.55          | 0.044 | 0.62                               | 0.053 | 0.58                       | 0.049 | 0.59                   | 0.068 | <b>0.63</b>    | 0.052 |
|               | IoU       | 0.50          | 0.038 | 0.55                               | 0.047 | 0.52                       | 0.043 | 0.52                   | 0.049 | <b>0.55</b>    | 0.046 |
|               | Recall    | <b>0.73</b>   | 0.055 | 0.71                               | 0.064 | 0.70                       | 0.06  | 0.72                   | 0.075 | 0.71           | 0.061 |
|               | Precision | 0.57          | 0.048 | 0.68                               | 0.055 | 0.63                       | 0.054 | 0.63                   | 0.075 | <b>0.68</b>    | 0.054 |

**Supplementary Table 8. Computational costs of processing one image**

| Epoch     | Computational cost (seconds) of different methods |               |                |
|-----------|---------------------------------------------------|---------------|----------------|
|           | FCN8                                              | Multi-SInfNet | Multi-SSInfNet |
| 1         | 36.61s                                            | 49.68         | 50.28          |
| 2         | 35.73                                             | 51.03         | 50.41          |
| 3         | 36.03                                             | 50.38         | 50.17          |
| 4         | 36.69                                             | 48.52         | 50.34          |
| 5         | 38.51                                             | 48.08         | 52.19          |
| 6         | 37.84                                             | 48.26         | 52.88          |
| 7         | 35.91                                             | 48.47         | 51.88          |
| 8         | 36.01                                             | 49.38         | 53.73          |
| 9         | 35.63                                             | 49.69         | 54.26          |
| 10        | 36.11                                             | 48.65         | 54.43          |
| Average   | 36.051                                            | 49.21         | 52.06          |
| Relative* | 0.742                                             | 1             | 1.06           |

\* The computation analysis was calculated relatively to the baseline multi SInfNet.
